# Supplementary material
Source: PubMed Central journal article supplement (PMC5752871)
Supplement: AEM.01646-17_zam002188250s1.pdf [file AEM.01646-17_zam002188250s1.pdf]

**Year-round shotgun metagenomes reveal stable microbial communities in agricultural soils and novel ammonia oxidizers responding to fertilization**

Luis H. Orellana<sup>a</sup>, Joanne C. Chee-Sanford<sup>b</sup>, Robert A. Sanford<sup>c</sup>, Frank E. Löffler<sup>d,e</sup>, and Konstantinos T. Konstantinidis<sup>a,#</sup>

Georgia Institute of Technology, Atlanta, Georgia, USA<sup>a</sup>; US Department of Agriculture—Agricultural Research Service, Urbana, Illinois, USA<sup>b</sup>; University of Illinois, Urbana, Illinois, USA<sup>c</sup>; University of Tennessee, Knoxville, Tennessee, USA<sup>d</sup>; Bioscience Division, Oak Ridge National Laboratory, Oak Ridge, Tennessee, USA<sup>e</sup>.

## Supporting information

### 2 Experimental Procedures

#### Functional annotation of short-reads using SEED in soil and fresh water metagenomes

4 SEED functional categories examined in detail for pathways of secondary metabolism included the terms “Iron acquisition and metabolism”, “Membrane transport”, “Metabolism of aromatic compounds”, “Motility and chemotaxis”, “Nitrogen metabolism”, “Phosphorus metabolism”, “Potassium metabolism”, “Secondary metabolism”, and “Sulfur metabolism”.

8 Categories having above 0.01% relative abundance, on average, for top and deep soil layers in both sites were used for the determination of coefficient of variation between and within  
10 samples. The same annotation strategy was used for Lake Lanier metagenomes over the course of 1 year (1101B, 1104A, 1107A, and 1108A) and 2 years (1007B, 1008A, 1009A,  
12 1010A, 1101B, 1104A, 1107A, and 1108A) (1).

#### Identification and analyses of 16S rRNA gene sequences

14 Short-read sequences encoding 16S rRNA gene fragments were extracted from each metagenome by using SortMeRNA (2) and their taxonomy was assigned using RDP classifier  
16 (cutoff 50)(3). In addition to the taxonomic annotation, operational taxonomic units (OTUs) were determined using a closed-reference OTU picking strategy as implemented in QIIME (4) using  
18 the same recovered 16S rRNA gene fragments. Sequences were clustered into OTUs at 97% similarity using UCLUST (Edgar, 2010) and using references from SILVA database v111 (Quast  
20 *et al.*, 2013).

#### 22 Identification of glycoside hydrolase genes

24 Glycoside hydrolase (GH) protein sequences in unassembled metagenomes were detected by querying the short-reads against the dbCAN database (5) using BLASTx (default  
26 settings and minimum 60% identity and 70% query coverage for a match). MAGs harboring GH proteins were detected using BLASTp (default settings and minimum 60% identity and 70% query

28 coverage for a match) against the previous database. In both cases, results were summarized  
based on the family classification from the CAZy database (6) and categories proposed previously  
30 (7).

### **Phylogenetic trees and placement of short-reads**

32 Protein reference and assembled sequences were aligned using ClustalΩ (8) with  
default parameters. Resulting alignments were used to build phylogenetic trees in RAxML  
34 v8.0.19 (9). Identified short-reads encoding the protein of interest were extracted from soil  
metagenomes using ROCKER (BLASTx) and their protein-coding sequences were predicted  
36 using FragGeneScan (10). The latter sequences were added to the corresponding protein  
alignment using MAFFT (“addfragments”) (11) and were placed in the corresponding  
38 phylogenetic tree using RAxML EPA (-f v option) (12).

### **Visualization and clade classification of reads placements**

40 The visualization of the generated jplace files (13) was performed using the  
“JPlace.to\_iToL.rb” script from the enveomics collection (14) and subsequently visualized on iTol  
42 (15). Quantification of the number of reads assigned to a specific clade (e.g., to distinguish  
between *nxrA* or *narG* reads) was done using the “JPlace.distances.rb” script, also available in  
44 the enveomics collection.

To quantify *nirK* gene fragments assigned to specific clades we used the clades previously  
46 proposed (16). The same process as described above for *nxrA/narG* was repeated except that all  
reads detected by ROCKER models (I+II, III and *Thaumarchaeotea*) were used for classification.  
48 Clade IV (e.g., *Actinobacteria*) was intentionally omitted from this analysis due to the limited  
number of available genomes harboring *nirK*, which limited the development of a robust ROCKER  
50 model.

### **Results**

52 Given the different amounts of organic matter (OM) observed between the two sites and  
soil layers, we hypothesized that there would be site-specific microbial communities involved in

54 the cycling and degradation of carbonaceous material. Specifically, we sought to find a link  
between the soil type and the dynamics of genes encoding enzymes (e.g., glycoside hydrolases)  
56 directly involved in the hydrolysis of glycosidic bonds in plant-derived carbon biomass. Even  
though genes encoding glycoside hydrolases (GH) showed a slight increase (8%) at the end of  
58 the year in the top soil depth of Havana, stable GH gene abundances were observed throughout  
the year within the same soil depth at each site (Fig. S9). For instance, GH genes encoding  
60 amylolytic enzymes showed high and stable abundance in both soils (up to 0.16% and 0.19% of  
total GH genes in Havana and Urbana, respectively), regardless of the differing soil texture and  
62 quantity of soil organic matter. Both sites showed significantly higher relative abundance of GH  
genes on the top compared to the deeper soil layers (two tailed *t*-test,  $p < 0.001$ ) (Fig. S9), and  
64 Urbana showed, on average, 20.4% higher relative abundance of GH genes compared to  
Havana.

#### 66 **Taxonomic compositions of agricultural soils**

For Havana, *Proteobacteria* (~40%), *Acidobacteria* (~18%), and *Actinobacteria* (~17%)  
68 represented the most abundant phyla in both the 0-5 and 20-30cm depths. *Bacteroidetes*,  
*Actinobacteria*, and *Firmicutes* were distinctive in the top soil metagenomes ( $P$ -value adjusted  $<$   
70 0.0001), whereas *Nitrospirae*, *Thaumarcheota*, and *Euryarchaeota* were characteristic of the  
deeper soil layer ( $P$ -value adjusted  $\leq 0.001$ ), in agreement with functional annotation results (Fig.  
72 S3b). At the order level, *Sphingomonadales*, *Sphingobacteriales*, *Actinomycetales*, and  
*Solirubrobacterales* were distinctive in the top layer, and *Nitrosopumilales*, *Neisseriales*,  
74 *Nitrospirales*, *Bacillales*, and *Rhodospirillales* were more abundant in the deeper metagenomes  
( $P$ -value adjusted  $\leq 0.0001$ ). For Urbana, *Proteobacteria* (32%), *Actinobacteria* (22%) and  
76 *Acidobacteria* (~19%) represented the most abundant phyla in both depths (Fig. S3b).  
*Bacteroidetes* and *Gemmatimonadetes* were more abundant in the top layer, whereas  
78 *Verrucomicrobia*, *Chloroflexi* and *Thaumarchaeota* were distinctive of the deep layer ( $P$ -value  
adjusted  $< 0.001$ ). At the order level, *Flavobacteriales*, *Sphingomonadales*, *Caulobacterales*,

80 *Xanthomonadales*, *Solirubrobacterales*, and *Burkholderiales* where characteristic of the top layer,  
whereas *Anaerolineales*, *Nitrospirales*, and *Nitrososphaerales* were distinctive of the lower layer  
82 ( $P$ -value adjusted  $< 0.05$ ). Comparison of alpha diversity (Chao-Shen entropy index), based on  
the taxonomy at the phyla and order levels of the recovered 16S rRNA gene fragments, showed  
84 significant differences between the two soil layers in Urbana. For Havana, significant differences  
in alpha diversity were only detected at the phylum level between top and deep soils (Fig. S1b).

86 Using a closed reference OTU picking strategy, over 61% of the recovered 16S rRNA  
gene sequences in each site were clustered into an average of 3,482 and 2,170 OTUs (97%  
88 similarity) per sample in Havana and Urbana, respectively (defined at 97% 16S rRNA gene  
sequence identity). OTU projections per sample (Chao1 index) showed that Havana harbored  
90 more OTUs than Urbana soils (two-tailed  $t$ -test,  $P < 0.01$ ). In addition, the latter estimates revealed  
that the detected OTUs in Havana ranged from 46% to 73% of the estimated total number of  
92 OTUs depending on the sample considered, whereas these values ranged from 49% to 82% in  
Urbana. Both sites shared 19.9% of the total detected OTUs ( $n=12,125$ ) whereas 42.6% and  
94 37.5% OTUs were specific to Havana and Urbana, respectively. A comparison of top vs. deep  
OTUs showed that in Havana, statistically overrepresented OTUs (Log 2-fold  $\geq 2$  and  $p$ -adjusted  
96  $< 0.01$ ) in the top layer belonged to *Actinobacteria* (25.3%), *Alphaproteobacteria* (22.6%), and  
*Chloracidobacteria* (16.6%) whereas enriched OTUs in the deep layer belonged to  
98 *Gemmatimonadetes* (16%), *Nitrospirae* (10.2%), and *Thaumarchaeota* (10.2%). Similarly,  
overrepresented OTUs in the top layer of Urbana samples belonged to *Alphaproteobacteria*  
100 (46.5%), *Thermoleophilia* (14%) and *Actinobacteria* (11.6%) whereas enriched OTUs in the deep  
layer were *Actinobacteria* (25.3%), *Alphaproteobacteria* (22.6%), and *Chloracidobacteria*  
102 (16.6%).

### Denitrification genes

104 Hallmark denitrification genes showed stable abundances throughout the year but  
differences between soil layers and sites. For instance, in Havana, nitrate reductase (*narG*), nitrite

106 reductases (*nirK* and *nirS*), and nitrous oxide reductase (*nosZ*) showed significantly higher  
abundance in the deep compared to the top soil layer (Fig. S5). Even though both nitrite  
108 reductases were more abundant in the deeper soil layer, *nirK* was, on average, 9.5 and 6.1 times  
more abundant than *nirS* in the top and deep soil layers, respectively. On the other hand, opposite  
110 abundance patterns for denitrification genes were observed for Urbana. For instance, *narG*, *nirK*,  
*nirS*, and *norB* were statistically significantly more abundant in the surface soil layer compared to  
112 the deep soil layer (Fig. S5), probably as a result of the contrasting edaphic factors between the  
sites. In addition, in both sites, *nrfA* showed the opposite abundance patterns compared to  
114 denitrification genes. Consistent with our previous reports from composite soil samples from the  
same agricultural soils (17), clade II, or atypical *nosZ*, gene fragments showed higher abundance  
116 throughout the year in both sites. In Havana, clade II *nosZ* gene fragments were, on average, ~7  
times more abundant than their clade I counterparts in both soil layers across the year.  
118 Interestingly, similar trends were observed in Urbana where atypical *nosZ* gene fragments were  
on average 9.7 and 15.9 times more abundant than their typical counterparts in the top and deep  
120 soil layers throughout the year, respectively.

### **Recovered populations from metagenomes**

122 The assembly and binning resulted in 69 population MAGs in total from both sites, having  
over 50% completion and less than 20% of contamination based on the presence of 104 and 26  
124 single-copy bacterial and archaeal genes, respectively. These genes might not always be present  
in all microbial lineages, therefore, gene content and completeness values were likely  
126 underestimated. The use of relatively low stringency criteria was due the low fraction of  
assembled metagenomic reads. Even at this level of stringency, only 69 MAGs, representing  
128 ~30% of the total MAGs obtained, were selected. The remaining MAGs were even more  
incomplete or contaminated despite efforts to refine binning by performing a second round of  
130 assembly (see Experimental Procedures for details). Genome sizes ranged from 1.1 to 6.7 Mbp,  
and G+C% content varied from 35 to 72% (Table S6). Inferred taxonomy revealed that most

132 MAGs represented members of *Proteobacteria*, *Acidobacteria*, and *Actinobacteria* in both soils  
whereas *Verrucomicrobia* and *Gemmatimonadetes* were characteristic of Urbana and Havana,  
134 respectively. As expected, genomic comparisons based on average amino acid (AAI) values (18)  
revealed that most of the obtained MAGs likely represented novel organisms when compared to  
136 the NCBI prokaryotic genome database (Table S6). For Havana, only 4.3% of the MAGs had AAI  
values greater than ~65% (i.e., shared genus) (19) compared to their close relatives. A similar  
138 trend was observed for Urbana MAGs where none of the MAGs likely corresponded to known  
genera. However, closely related MAGs, most likely representing member of the same genus  
140 (i.e., sharing AAI >65%), were detected in both sites. For instance, in Havana, *Nitrospira* MAGs  
HD017 and HD021 shared 81.69% AAI (SD: 15.43%, from 2288 proteins); *Gemmatimonadetes*  
142 MAGs HD002 and HD027 shared 77.47% AAI (SD: 15.80%, from 2429 proteins). In Urbana,  
*Verrucomicrobia* MAGs UD002 and UD007 shared 82.65% AAI (SD: 16.82%, from 1713  
144 proteins). Several MAGs were specific to each site but shared relatively high AAI values such as  
the *Thaumarchaeota* MAGs HD032 and UD001 which shared 76.79% AAI (SD: 14.46%, from  
146 1560 proteins).

### **Diversity of MAGs involved in carbon cycling**

148 Differences in the number of genes encoding key polysaccharide degradation enzymes  
(i.e., glycoside hydrolase enzymes) were observed between the MAGs. For instance, MAGs  
150 from Urbana encode significantly more glycoside hydrolases (GH) compared to Havana MAGs  
(unpaired *t*-test, *P*-value < 0.05, see also Table S7). In addition, MAGs from Urbana showed  
152 almost double the number of cellulase genes encoding oligosaccharide-degrading enzymes and  
amylolytic enzymes compared to MAGs from Havana. Genes encoding beta-glucosidase  
154 enzymes GH3 (n=93) and the amylolytic enzymes GH13 (n=320) and GH15 (n=78), were  
among the most commonly detected glycoside hydrolases in recovered MAGs. These results  
156 were consistent with the results obtained from recovered short-reads and, in general, with a

higher soil organic matter content in the Urbana (silty loam) soil vs. its Havana (sandy) counterpart. The MAGs UD035 (*Actinobacteria*), UD029 (*Firmicutes*), and UT009 (*Acidobacteria*) from Urbana had the highest number of GH genes (n=67, 41 and 49 GH genes) and mostly corresponded to oligosaccharide-degrading and amylolytic enzymes. In Havana, MAGs HD112 and HD089 (*Acidobacteria*) and MAG HD116 (*Bacteroidetes*) had the highest number of HG genes also corresponding to cellulases, oligosaccharide-degrading and amylolytic enzymes.

## 164 **Discussion**

### **Unexpected genetic diversity in agricultural soils**

166 The majority of the MAGs were predicted to belong to novel species, if not genera, reflecting the low representation of soil-dwelling microorganisms in current genomic databases. 168 For instance, highly abundant archaeal and bacterial nitrifier (discussed above) and *Verrucomicrobia* populations obtained from Urbana (e.g., MAG UD002) only shared ~46% AAI to 170 the closest reference genome. Microbial communities belonging to the this group are underrepresented in genomic databases and have been predicted to inhabit soils with high 172 organic matter content such as those found in Urbana (20). It is important to note that while the MAGs were searched against the NCBI prokaryotic genome database (as implemented in MiGA) 174 for close relatives, more recently sequenced genomes, which are not yet part of NCBI, would have been missed. For instance, MAG UD053 shared 61% AAI with recently described and novel 176 phylum *Candidatus* Rokubacteria (21). Further, abundant populations detected based on 16S rRNA gene fragments recovered in the metagenomes were not well represented in the recovered 178 MAGs, such as *Gemmatimonadetes* in Urbana. Apparently, the latter genomes were not well binned, presumably due to high intra-population sequence diversity. Altogether, the MAGs 180 reported here represent mostly novel and deep-branching taxa and offer a genomic reference for future studies targeting abundant natural microbial communities found in agricultural soils.

182 Recent findings have revealed that PCR-based surveys targeting N-cycle genes have



overlooked a vast amount of natural diversity related to nitrification (22-25) and denitrification  
184 genes such as *nirK* (16), *nosZ* (17), and *nrfA* (26). These findings suggest that the previously  
unaccounted gene diversity might play an important role in key biogeochemical cycles. Our results  
186 show that the use of metagenomic approaches in combination with reliable detection tools (e.g.,  
ROCKER) can circumvent these limitations in samples of high sequence complexity. For instance,  
188 abundant *nirK* genes found in the soil samples were assigned to *Thaumarchaeota*, which has  
been inadvertently excluded in previous PCR-based gene surveys. Interestingly, the changes in  
190 relative abundance for *Thaumarchaeota nirK* gene fragments are consistent with recent findings  
that have proposed an alternative role for this archaeal NirK activity as part of the ammonia  
192 oxidation to nitrite mechanism in *Thaumarchaeota* (27).

### **Genes and microbial populations involved in biomass degradation**

194 We explored the impact of the microbial communities in the breakdown and recycling of  
plant biomass in soils, by surveying genes associated with biomass and polysaccharide  
196 degradation. The two agricultural sites share a similar history of cropping where biomass derived  
from either corn or soybean represents a constant input of C at the end of the growing season  
198 and this was reflected by stable abundances in all GH categories studied. Even though a higher  
influence of plants (e.g., root-exudates) during crop-growing periods was expected (e.g., June  
200 and September), our core collecting regime was directed to sample in between plant rows, and  
thus, likely missed microorganisms in close proximity to roots. Overall, Urbana (silt-loam soil)  
202 showed a higher relative abundance of GH genes at both gene and genomic population levels  
compared to Havana, likely explained by the intrinsic characteristics of the soils. For instance, the  
204 differences in sorption and binding capacities particular to each soil type resulted in a higher OM  
availability in Urbana compared to Havana, which likely accounted for the differences in GH genes  
206 between the two sites. Further, previous reports have recognized that genes encoding GHs  
belonging to the family GH13 are among the most widespread and abundant amyolytic enzymes

208 found in microbial genomes (28) and soils (29), consistent with the findings based on the  
recovered MAGs reported here. Other abundant GHs in the recovered MAGs belonged to the  
210 glucoamylase GH15 family, which in combination with debranching enzymes from GH13 have  
been proposed as part of the main enzymes for degradation of polysaccharides in bacteria (28).  
212 Therefore, in addition to playing a role in the cycling of N in soils, MAGs encoding GH might also  
participate in maintaining and recycling labile carbon in the explored agricultural soils.

## References

1. **Oh S, Caro-Quintero A, Tsementzi D, DeLeon-Rodriguez N, Luo C, Poretsky R, Konstantinidis KT.** 2011. Metagenomic insights into the evolution, function, and complexity of the planktonic microbial community of Lake Lanier, a temperate freshwater ecosystem. *Appl Environ Microbiol* **77**:6000–6011.
2. **Kopylova E, Noé L, Touzet H.** 2012. SortMeRNA: fast and accurate filtering of ribosomal RNAs in metatranscriptomic data. *Bioinformatics* **28**:3211–3217.
3. **Wang Q, Garrity GM, Tiedje JM, Cole JR.** 2007. Naive Bayesian classifier for rapid assignment of rRNA sequences into the new bacterial taxonomy. *Appl Environ Microbiol* **73**:5261–5267.
4. **Caporaso JG, Kuczynski J, Stombaugh J, Bittinger K, Bushman FD, Costello EK, Fierer N, Peña AG, Goodrich JK, Gordon JI, Huttley GA, Kelley ST, Knights D, Koenig JE, Ley RE, Lozupone CA, McDonald D, Muegge BD, Pirrung M, Reeder J, Sevinsky JR, Turnbaugh PJ, Walters WA, Widmann J, Yatsunencko T, Zaneveld J, Knight R.** 2010. QIIME allows analysis of high-throughput community sequencing data. *Nat Methods* **7**:335–336.
5. **Yin Y, Mao X, Yang J, Chen X, Mao F, Xu Y.** 2012. dbCAN: a web resource for automated carbohydrate-active enzyme annotation. *Nucleic Acids Res* **40**:W445–51.
6. **Lombard V, Golaconda Ramulu H, Drula E, Coutinho PM, Henrissat B.** 2014. The carbohydrate-active enzymes database (CAZy) in 2013. *Nucleic Acids Res* **42**:D490–5.
7. **Allgaier M, Reddy A, Park JI, Ivanova N, D'haeseleer P, Lowry S, Sapra R, Hazen TC, Simmons BA, VanderGheynst JS, Hugenholtz P.** 2010. Targeted discovery of glycoside hydrolases from a switchgrass-adapted compost community. *PLoS ONE* **5**:e8812.
8. **Sievers F, Wilm A, Dineen D, Gibson TJ, Karplus K, Li W, Lopez R, McWilliam H, Remmert M, Söding J, Thompson JD, Higgins DG.** 2011. Fast, scalable generation of high-quality protein multiple sequence alignments using Clustal Omega. *Mol Syst Biol* **7**:539–539.
9. **Stamatakis A.** 2006. RAxML-VI-HPC: maximum likelihood-based phylogenetic analyses with thousands of taxa and mixed models. *Bioinformatics* **22**:2688–2690.
10. **Rho M, Tang H, Ye Y.** 2010. FragGeneScan: predicting genes in short and error-prone reads. *Nucleic Acids Res* **38**:e191.
11. **Katoh K, Standley DM.** 2013. MAFFT multiple sequence alignment software version 7: improvements in performance and usability. *Mol Biol Evol* **30**:772–780.
12. **Berger SA, Krompass D, Stamatakis A.** 2011. Performance, accuracy, and Web server for evolutionary placement of short sequence reads under maximum likelihood. *Syst Biol*

60:291–302.

13. **Matsen FA, Hoffman NG, Gallagher A, Stamatakis A.** 2012. A format for phylogenetic placements. *PLoS ONE* **7**:e31009.
14. **Rodriguez-R LM, Konstantinidis KT.** 2016. The enveomics collection: a toolbox for specialized analyses of microbial genomes and metagenomes. *PeerJ Prepr* **4**:e1900v1.
15. **Letunic I, Bork P.** 2011. Interactive Tree Of Life v2: online annotation and display of phylogenetic trees made easy. *Nucleic Acids Res* **39**:gkr201–W478.
16. **Wei W, Isobe K, Nishizawa T, Zhu L, Shiratori Y, Ohte N, Koba K, Otsuka S, Senoo K.** 2015. Higher diversity and abundance of denitrifying microorganisms in environments than considered previously. *ISME J* **9**:1–12.
17. **Orellana LH, Rodriguez-R LM, Higgins S, Chee-Sanford JC, Sanford RA, Ritalahti KM, Löffler FE, Konstantinidis KT.** 2014. Detecting nitrous oxide reductase (NosZ) genes in soil metagenomes: method development and implications for the nitrogen cycle. *mBio* **5**:e01193–14.
18. **Konstantinidis KT.** 2005. Genomic insights that advance the species definition for prokaryotes. *Proc Natl Acad Sci USA* **102**:2567–2572.
19. **Konstantinidis KT, Tiedje JM.** 2007. Prokaryotic taxonomy and phylogeny in the genomic era: advancements and challenges ahead. *Curr Opin Microbiol* **10**:504–509.
20. **Brewer TE, Handley KM, Carini P, Gilbert JA, Fierer N.** 2016. Genome reduction in an abundant and ubiquitous soil bacterium 'Candidatus Udaeobacter copiosus'. *Nat Microbiol* **2**:16198.
21. **Hug LA, Thomas BC, Sharon I, Brown CT, Sharma R, Hettich RL, Wilkins MJ, Williams KH, Singh A, Banfield JF.** 2015. Critical biogeochemical functions in the subsurface are associated with bacteria from new phyla and little studied lineages. *Environ Microbiol* **18**:159–173.
22. **Daims H, Lebedeva EV, Pjevac P, Han P, Herbold C, Albertsen M, Jehmlich N, Palatinszky M, Vierheilig J, Bulaev A, Kirkegaard RH, Bergen von M, Rattei T, Bendinger B, Nielsen PH, Wagner M.** 2015. Complete nitrification by *Nitrospira* bacteria. *Nature* **528**:504–509.
23. **van Kessel MAHJ, Speth DR, Albertsen M, Nielsen PH, Op den Camp HJM, Kartal B, Jetten MSM, Lüscher S.** 2015. Complete nitrification by a single microorganism. *Nature* **528**:555–559.
24. **Palomo A, Fowler SJ, Gülay A, Rasmussen S, Sicheritz-Ponten T, Smets BF.** 2016. Metagenomic analysis of rapid gravity sand filter microbial communities suggests novel physiology of *Nitrospira* spp. *ISME J* **10**:2569–2581.
25. **Pinto AJ, Marcus DN, Ijaz UZ, Bautista-de Lose Santos QM, Dick GJ, Raskin L.** 2016. Metagenomic evidence for the presence of comammox *Nitrospira*-like bacteria in a Drinking Water System. *mSphere* **1**:e00054–15.

26. **Nelson MB, Martiny AC, Martiny JBH.** 2016. Global biogeography of microbial nitrogen-cycling traits in soil. *Proc Natl Acad Sci USA* **113**:8033–8040.
27. **Kozlowski JA, Stieglmeier M, Schleper C, Klotz MG, Stein LY.** 2016. Pathways and key intermediates required for obligate aerobic ammonia-dependent chemolithotrophy in bacteria and Thaumarchaeota. *ISME J* **10**:1836–1845.
28. **Henrissat B, Deleury E, Coutinho PM.** 2002. Glycogen metabolism loss: a common marker of parasitic behaviour in bacteria? *Trends Genet* **18**:437–440.
29. **Howe A, Yang F, Williams RJ, Meyer F, Hofmockel KS.** 2016. Identification of the core set of carbon-associated genes in a bioenergy grassland soil. *PLoS ONE* **11**:e0166578.

## **Supplementary Figure Legends**

### **Supplementary Figure 1. Alpha diversity values determined for metagenomic samples. A.**

Diversity of metagenomic reads as determined by Nonpareil. The Chao-Shen entropy values for **B.** the order level of taxonomy and **C.** functional annotations (SEED subsystems).

### **Supplementary Figure 2. A. Distributions of coefficients of variation for all SEED**

**subsystems detected in soil metagenomes for all seasons.** Panel **B** summarizes the distributions of coefficient of variation for all SEED subsystems (left) and the subset devoted to secondary metabolism (right) for the three cores obtained for the 20-30 cm soil samples during June in Havana and Urbana. **C.** Distributions of coefficients of variation for all SEED subsystems (left) and a subset consisting of secondary metabolism annotations (right panel) in Lake Lanier metagenomes.

### **Supplementary Figure 3. Functional clustering and taxonomy for sandy (Havana) and silt-loam (Urbana) soils. A.**

Non-metric multidimensional scaling analysis based on SEED subsystems annotation of short-reads of the metagenomic samples showed independent clustering by site and depth. The length of the arrow is proportional to the correlation between measured metadata and determined ordination values. **B** Summary of the taxonomic affiliation (figure key) of the recovered 16S rRNA gene fragments obtained from soil metagenomes.

### **Supplementary Figure 4. Differential abundance of SEED subsystems between top (0-**

**5cm) and deep (20-30 cm) soil layers.** Predicted-protein sequences from short-reads were annotated using UniProt and subsequently classified into functional categories using SEED subsystems. Significant differences in abundance of SEED subsystems between top and deep layers were identified using a negative binomial test as implemented in DESeq2. Selected SEED subsystems showing  $\log_2$ -fold change  $\geq 1$  or  $\leq -1$  and adjusted  $P$ -values  $< 0.01$  are shown.

### **Supplementary Figure 5. Abundance of N-cycle genes in sandy (Havana) and silt-loam**

**(Urbana) soils.** Heatmaps show calculated relative abundance for N-cycle genes as genome

equivalents for Havana (left panel) and Urbana (right panel). Manually-curated databases for each N gene were searched against soil metagenomes using BLASTx and outputs were filtered using ROCKER models for each gene (see Methods for more details). Values for the 20-30 cm layer in June represent the average of the three soil cores.

**Supplementary Figure 6. Abundance and diversity for *hao* and *nxrA* in Havana.**

Phylogenetic reconstruction of Hao (A) and NxrA (B) protein sequences including assembled sequences from soil metagenomes. For reconstructed sequences, names in parentheses indicate corresponding metagenomic bins. The pie charts represent the placing of Havana metagenomic reads for archaeal and bacterial *amoA* genes using RAxML EPA. Pie chart radii represent the read abundance for each node (calculated as genome equivalents) and the colors of the slices represent the depth and month for the origin of the metagenomic reads.

**Supplementary Figure 7. Abundance and diversity for archaeal and bacterial *amoA*, *hao*, and *nxrA* in Urbana.**

Phylogenetic reconstruction of archaeal (A) and bacterial (B) AmoA, Hao (C) and NxrA (D) protein sequences including assembled sequences from soil metagenomes. For reconstructed sequences, names inside parentheses indicate corresponding metagenomic bins. The pie charts represent the placement of Havana metagenomic reads for archaeal and bacterial *amoA* genes using RAxML EPA. Pie chart radii represent the read abundance for each node (calculated as genome equivalents) and the colors of the slices represent the depth and month for the origin of the metagenomic reads.

**Supplementary Figure 8. Changes in abundance of metagenomic populations.** Log<sub>2</sub> fold changes in abundance (y-axis) between months (x-axis) were calculated using individual bin abundances.

**Supplementary Figure 9. Relative abundances of categories for glycoside hydrolases in both agricultural soils.**

Glycoside hydrolases (GH) gene fragments were detected in each metagenome and individual GH abundances were summarized in six functional categories.

## **Supplementary Tables**

**Supplementary Table 1. Soil metadata for Havana and Urbana samples.**

**Supplementary Table 2. Agricultural management for Havana and Urbana sites during 2012.**

**Supplementary Table 3. Metagenomic sequences and Nonpareil estimations for Havana and Urbana sites.**

**Supplementary Table 4. Summary for co-assemblies from Havana and Urbana.**

**Supplementary Table 5. Summary of ROCKER models used for detecting N genes in metagenomic soil samples.**

**Supplementary Table 6. Summary for obtained bins from Havana and Urbana.**

**Supplementary Table 7. Summary of Glycoside hydrolase enzymes found in metagenomic bins**



# Supplementary Figure 1

## Metagenomic reads

**A**

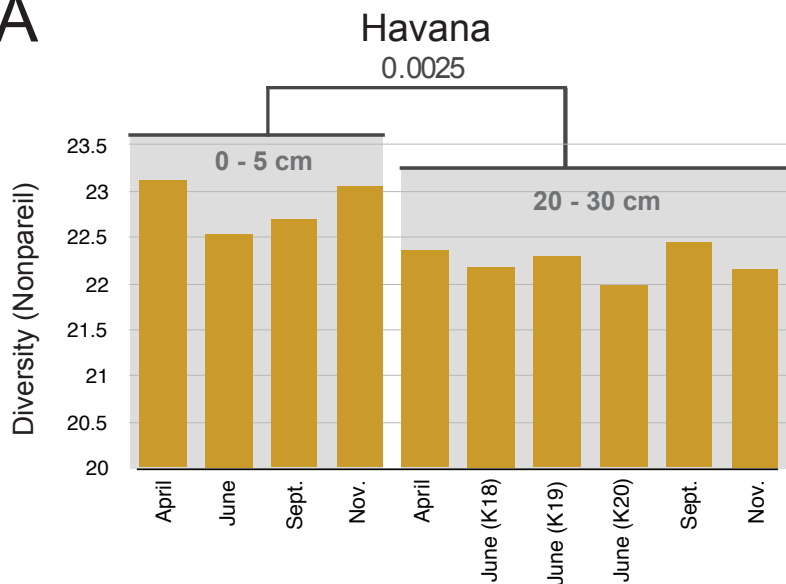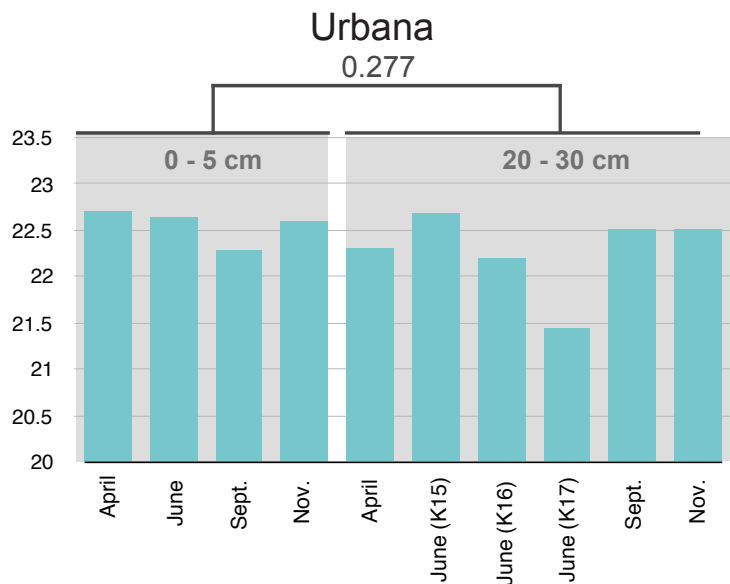

**B**

## Taxonomical Order

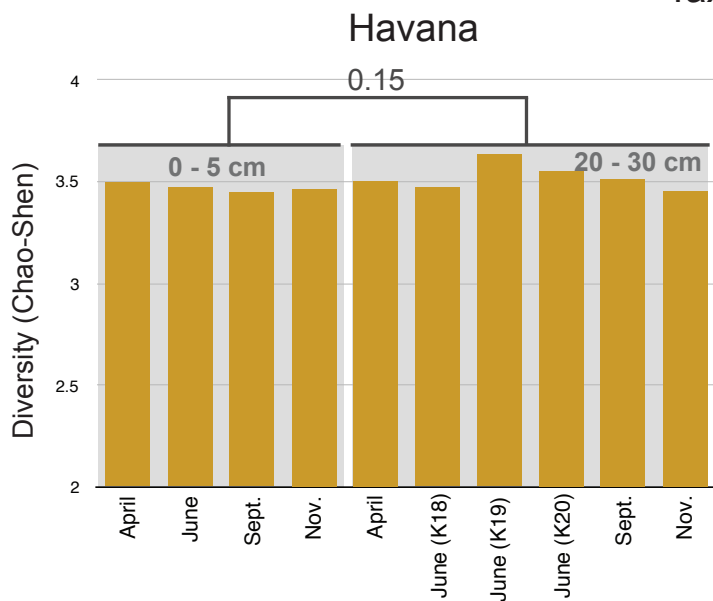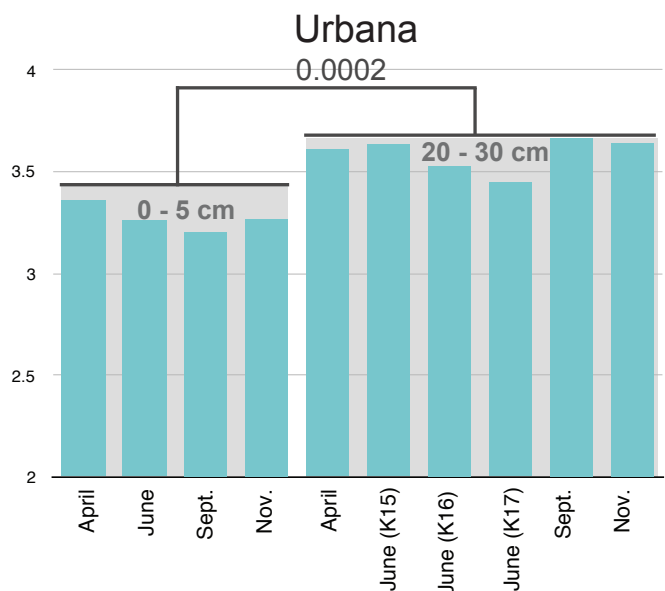

**C**

## SEED Subsystems

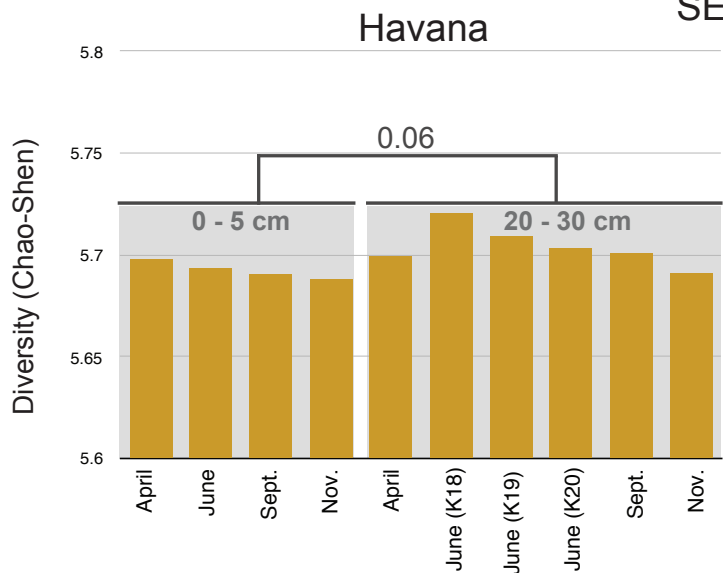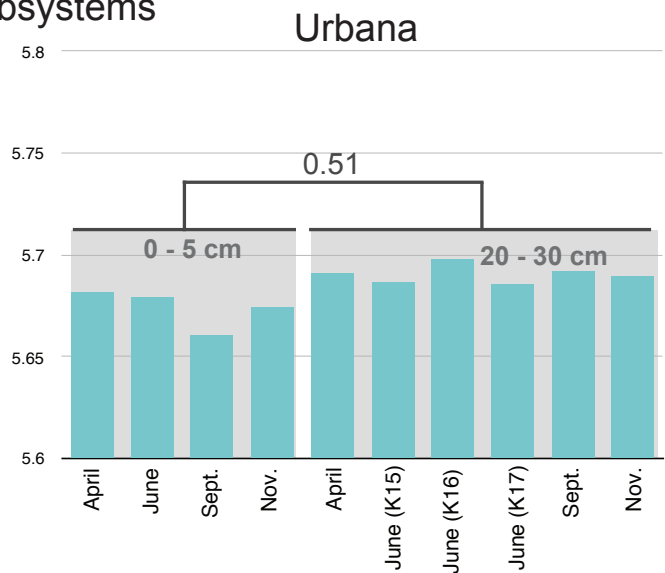

## Supplementary Figure 2

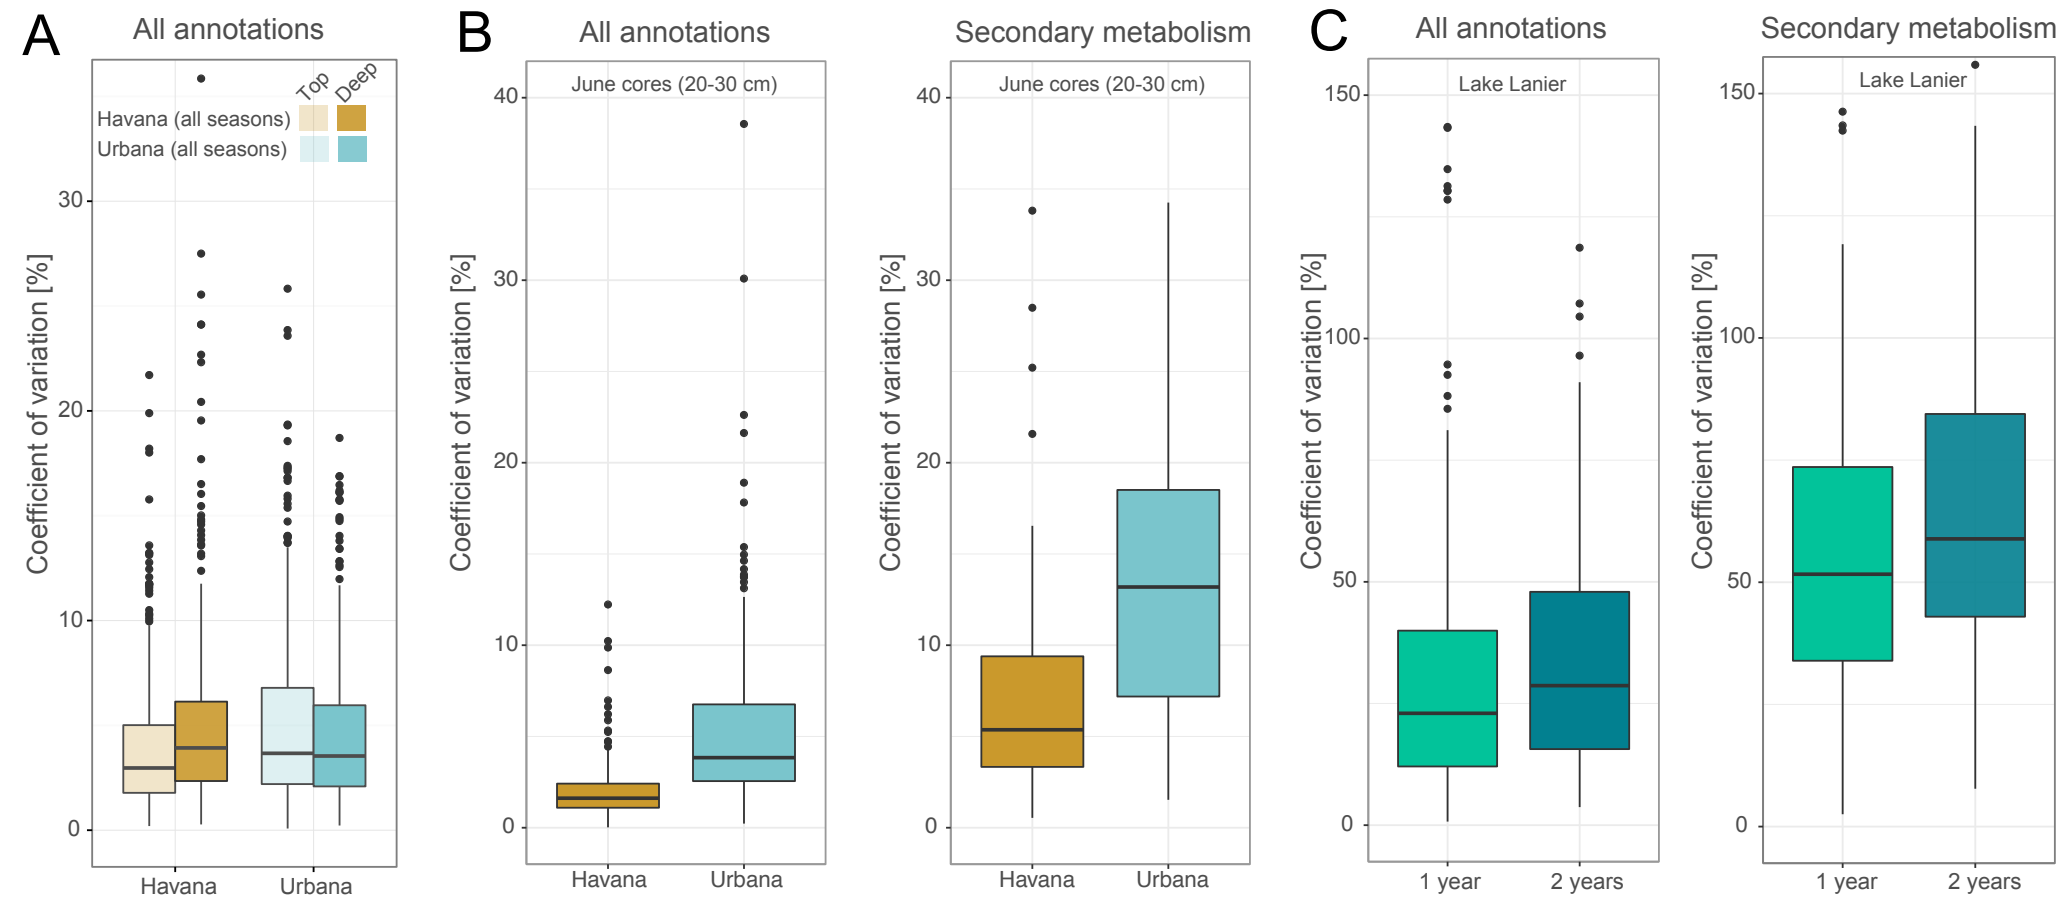

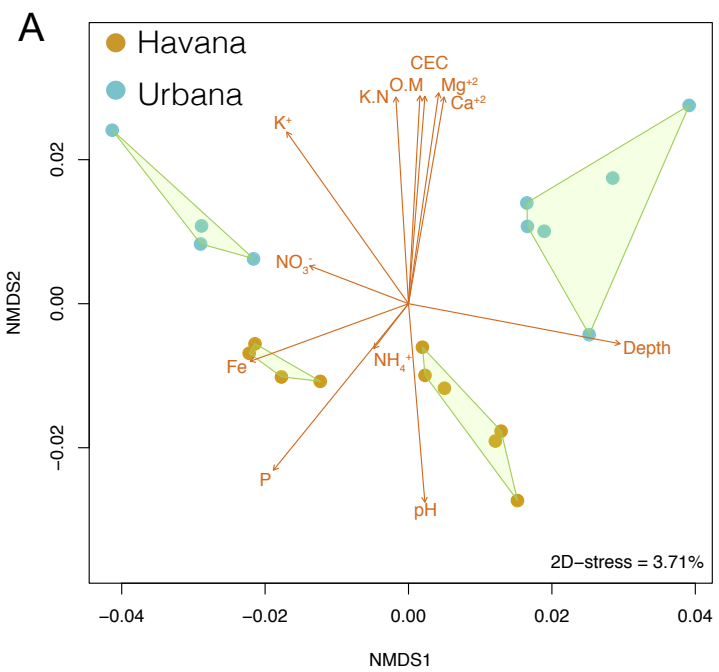

**Supplementary Figure 3**

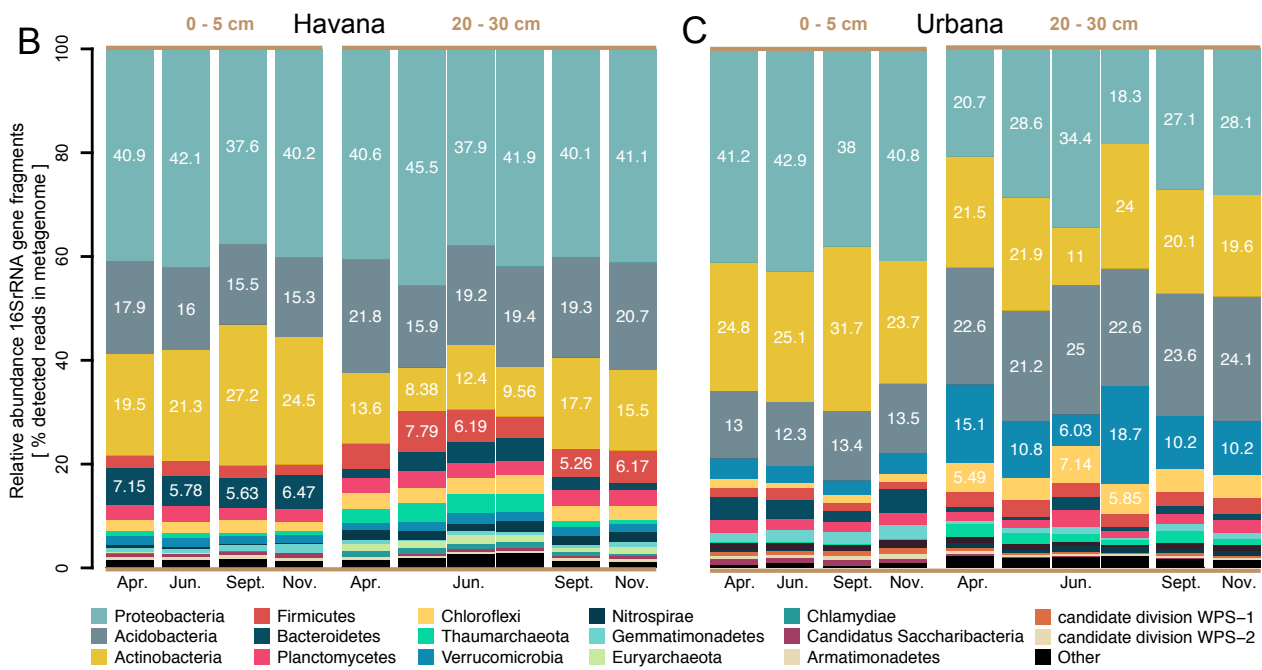

# Supplementary Figure 4

● Havana ● Urbana

← Deep → Surface

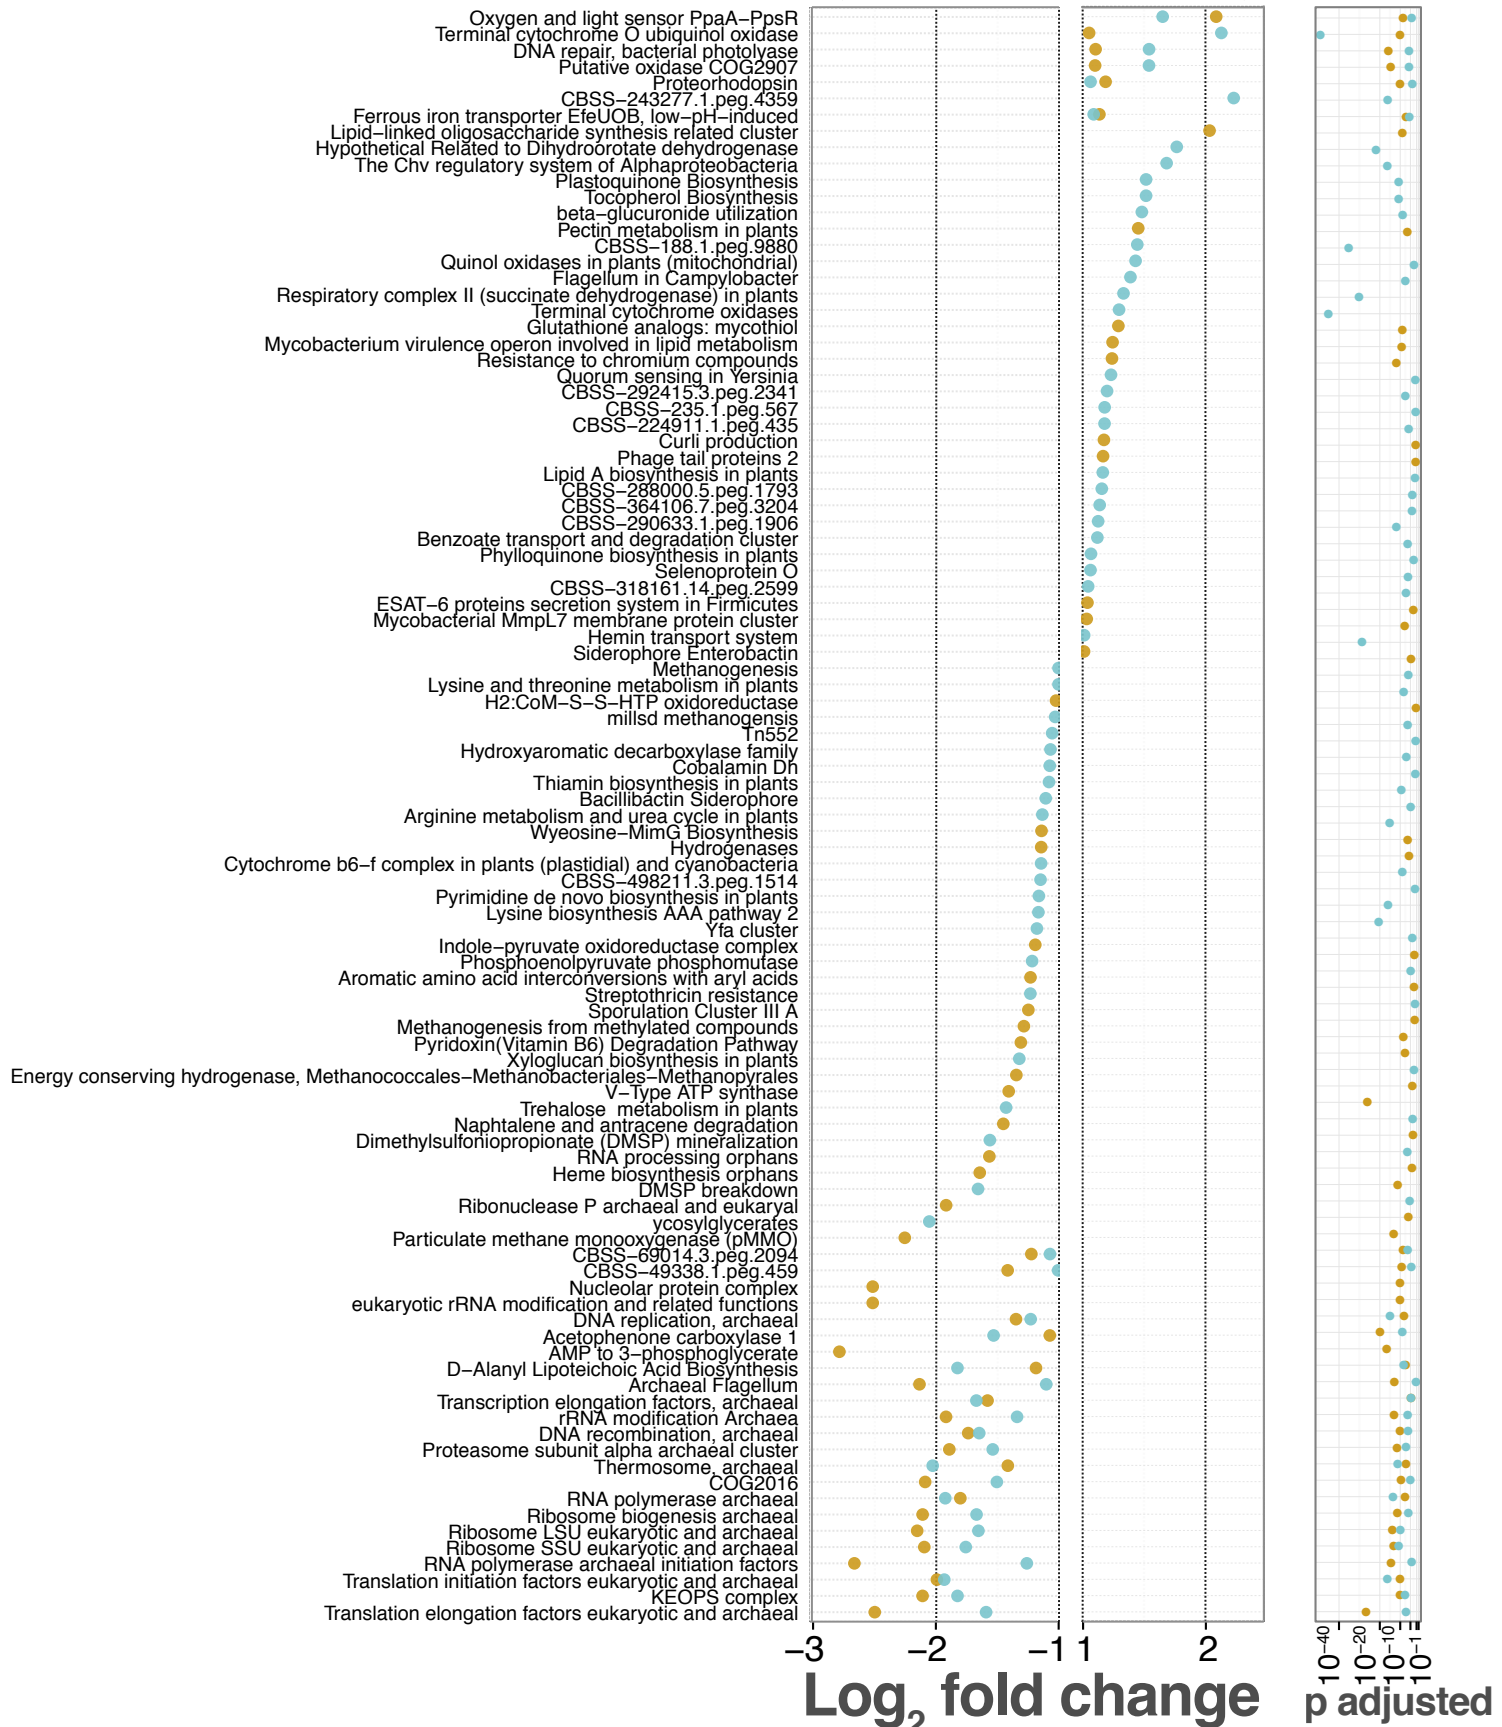

# Supplementary Figure 5

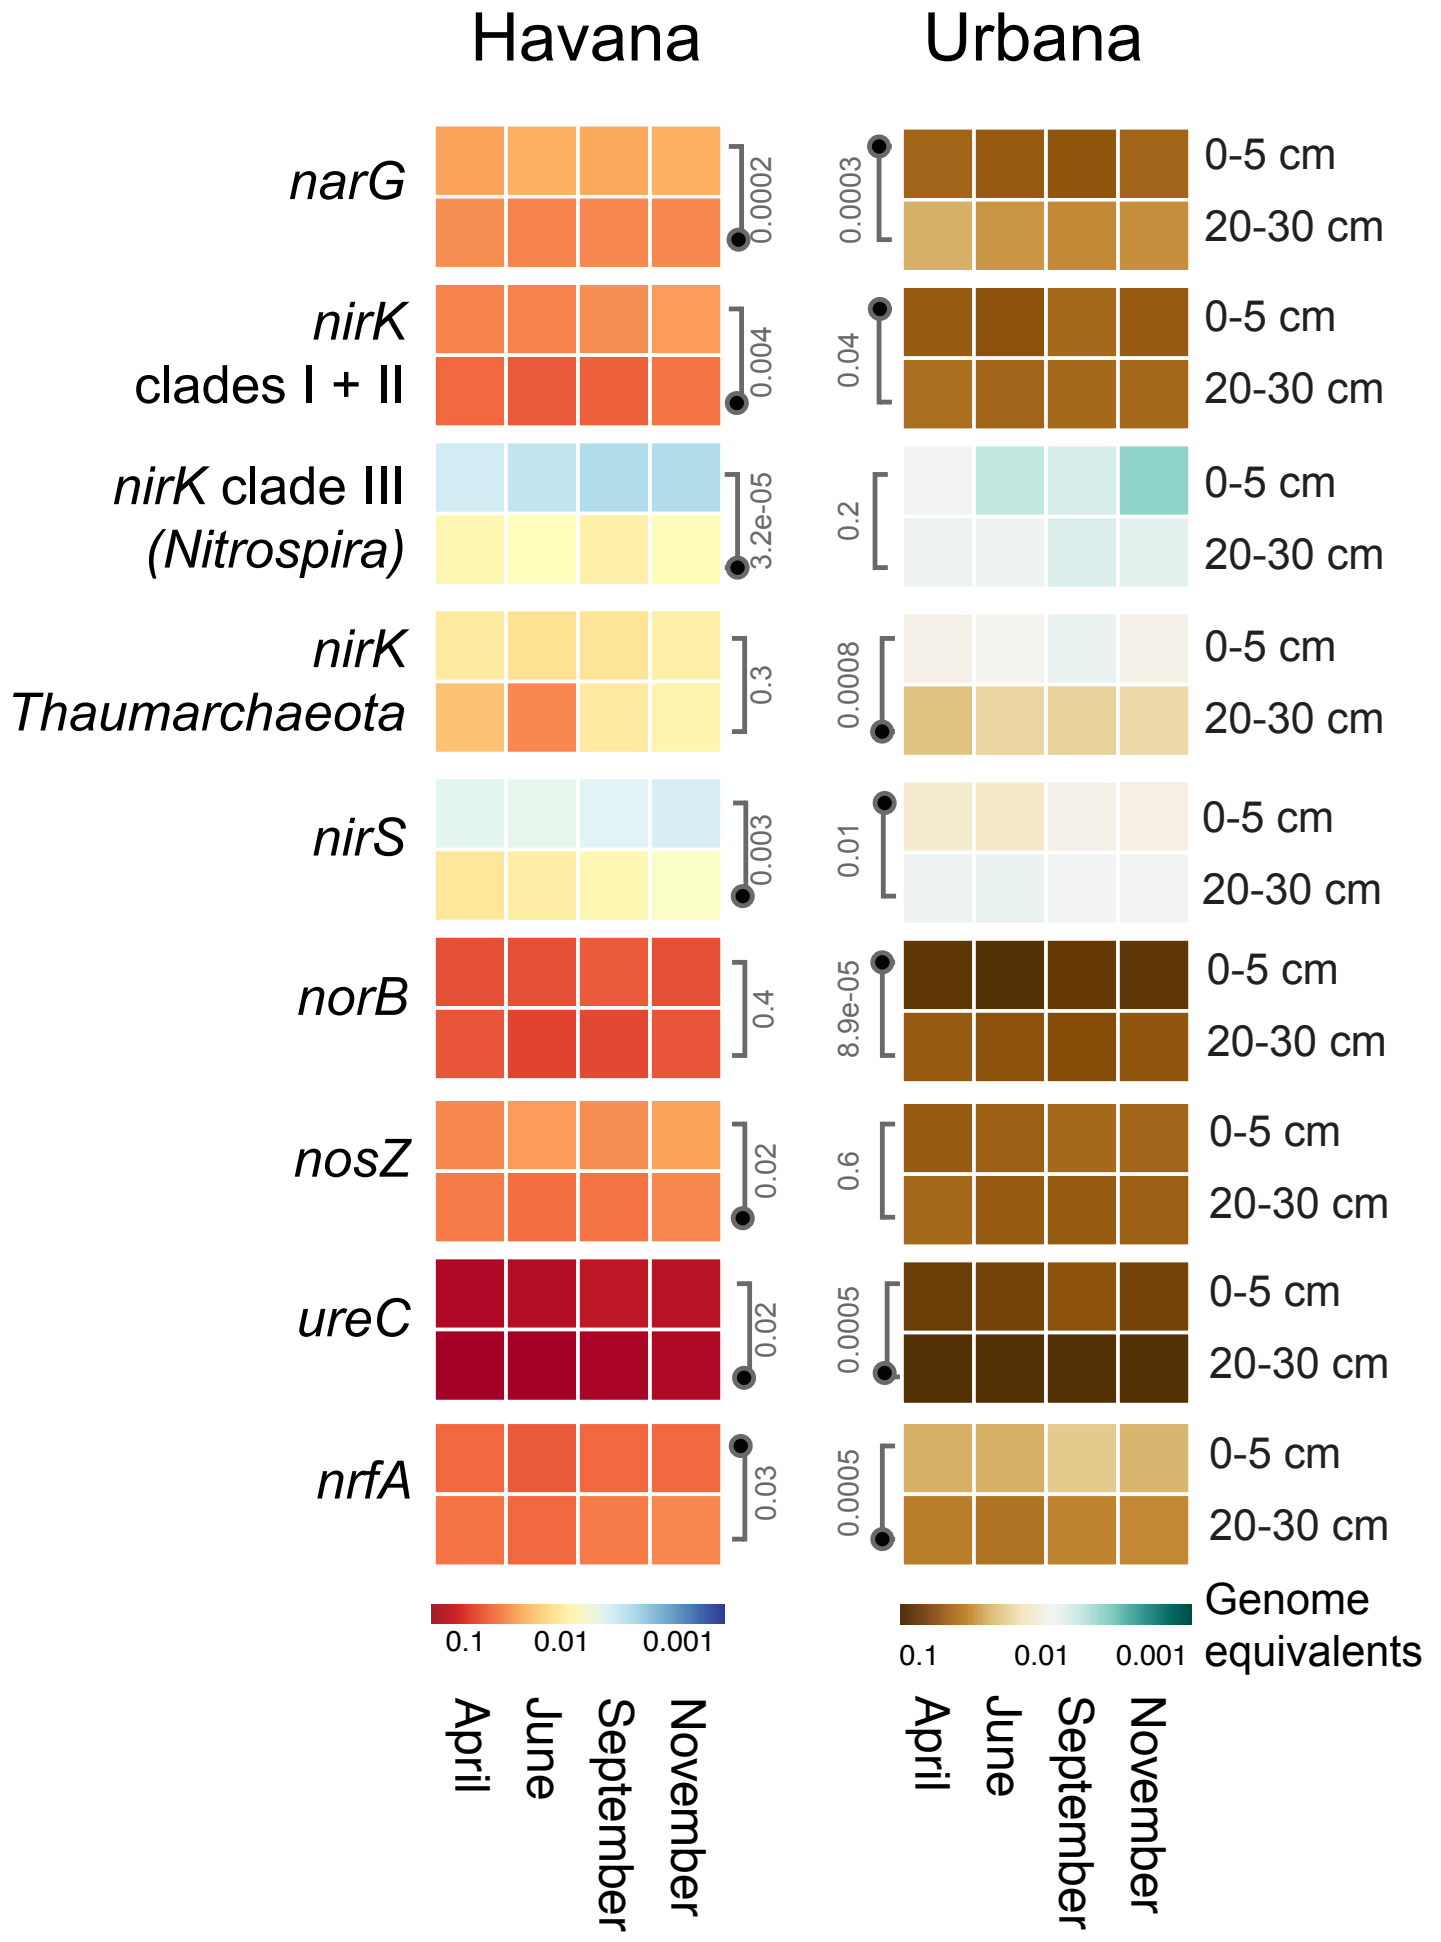

## Supplementary Figure 6

### A HAO

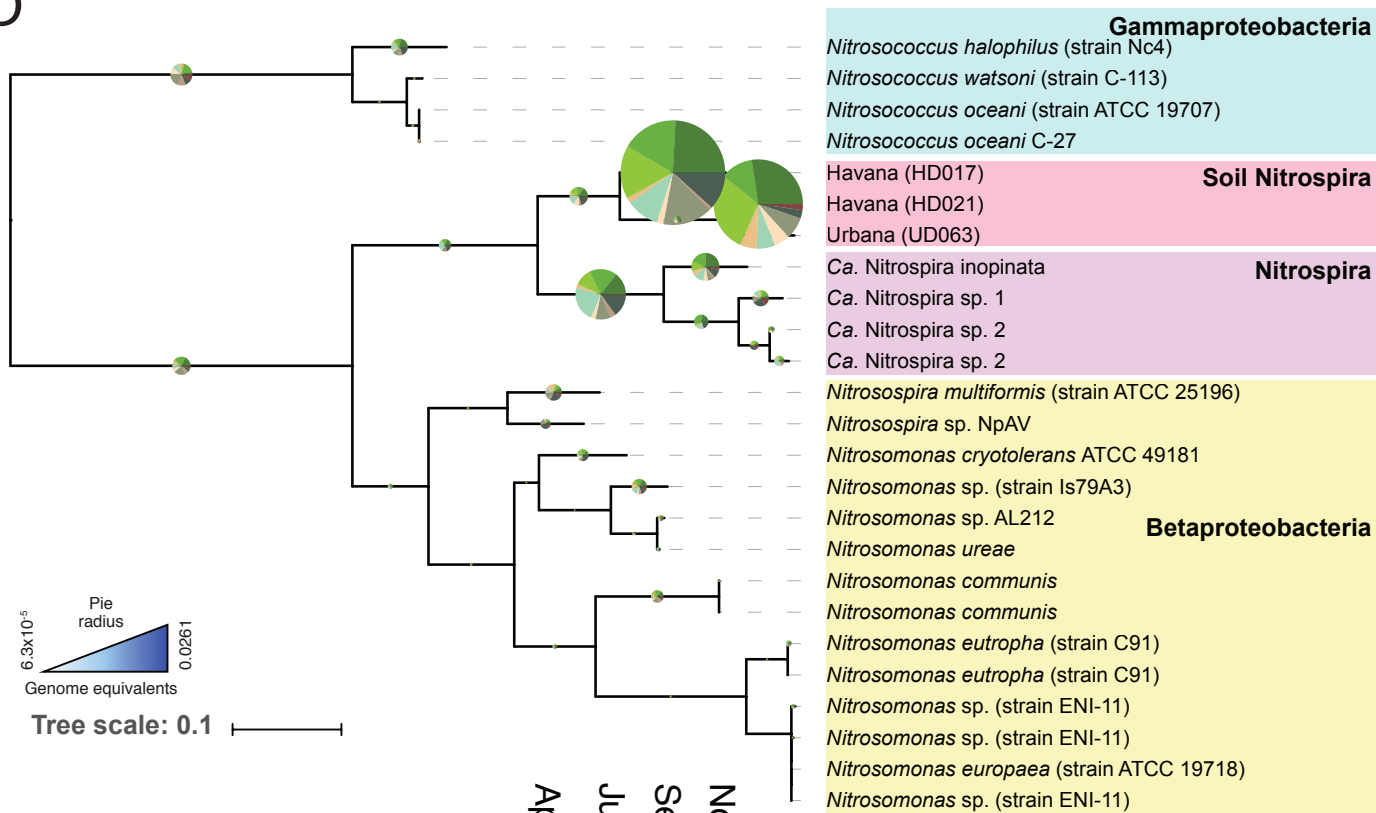

### B NxrA

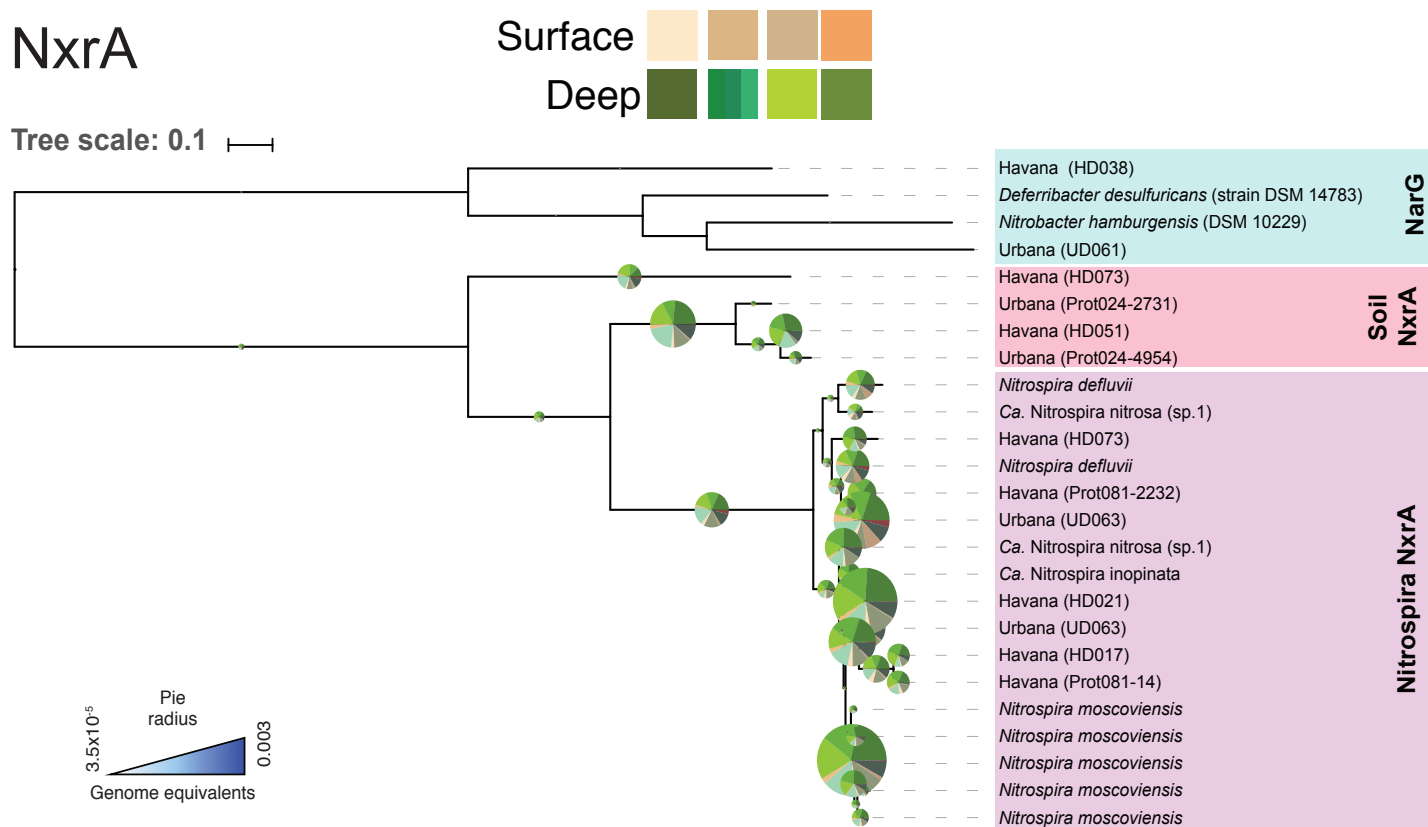

# Supplementary Figure 7

## A. Archaeal AmoA

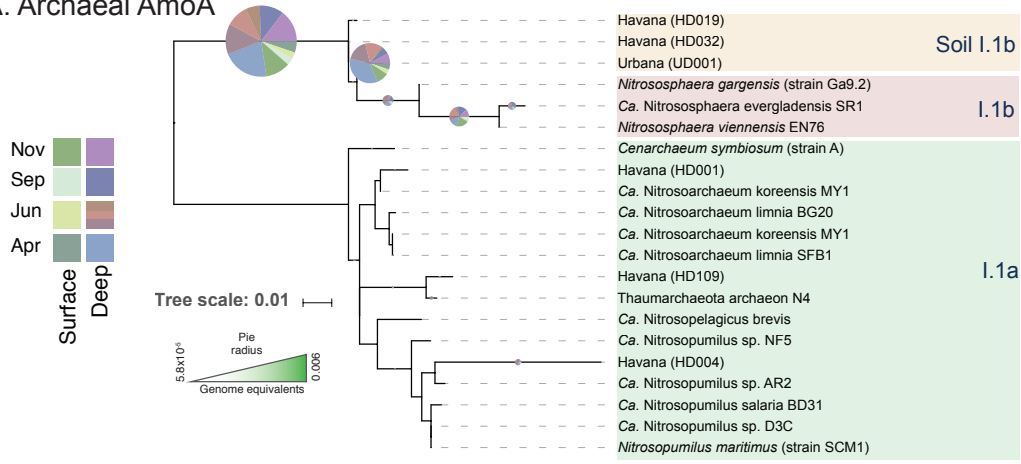

## B. Bacterial AmoA

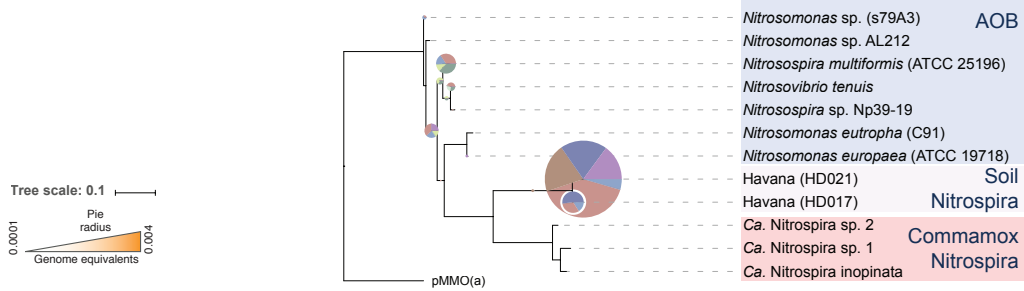

## C. HAO

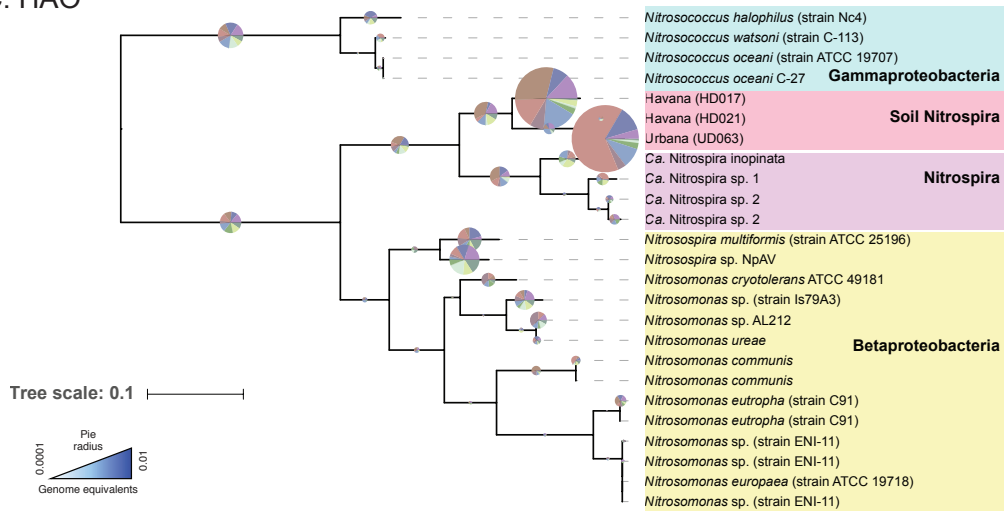

## D. NxrA

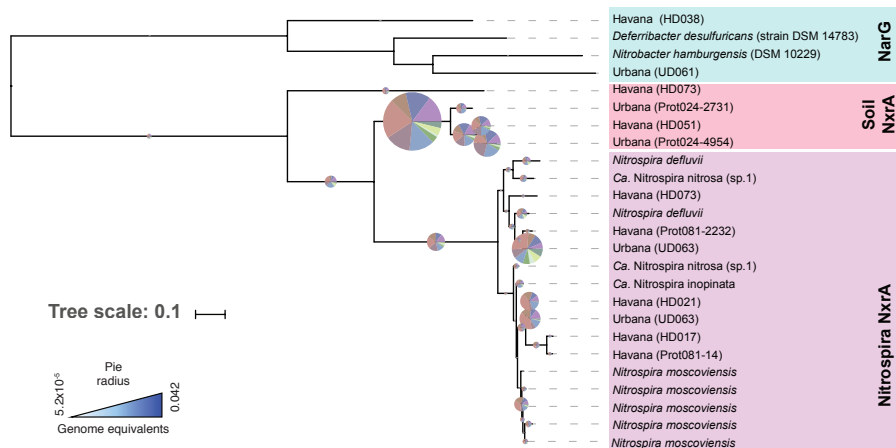

# Supplementary Figure 8

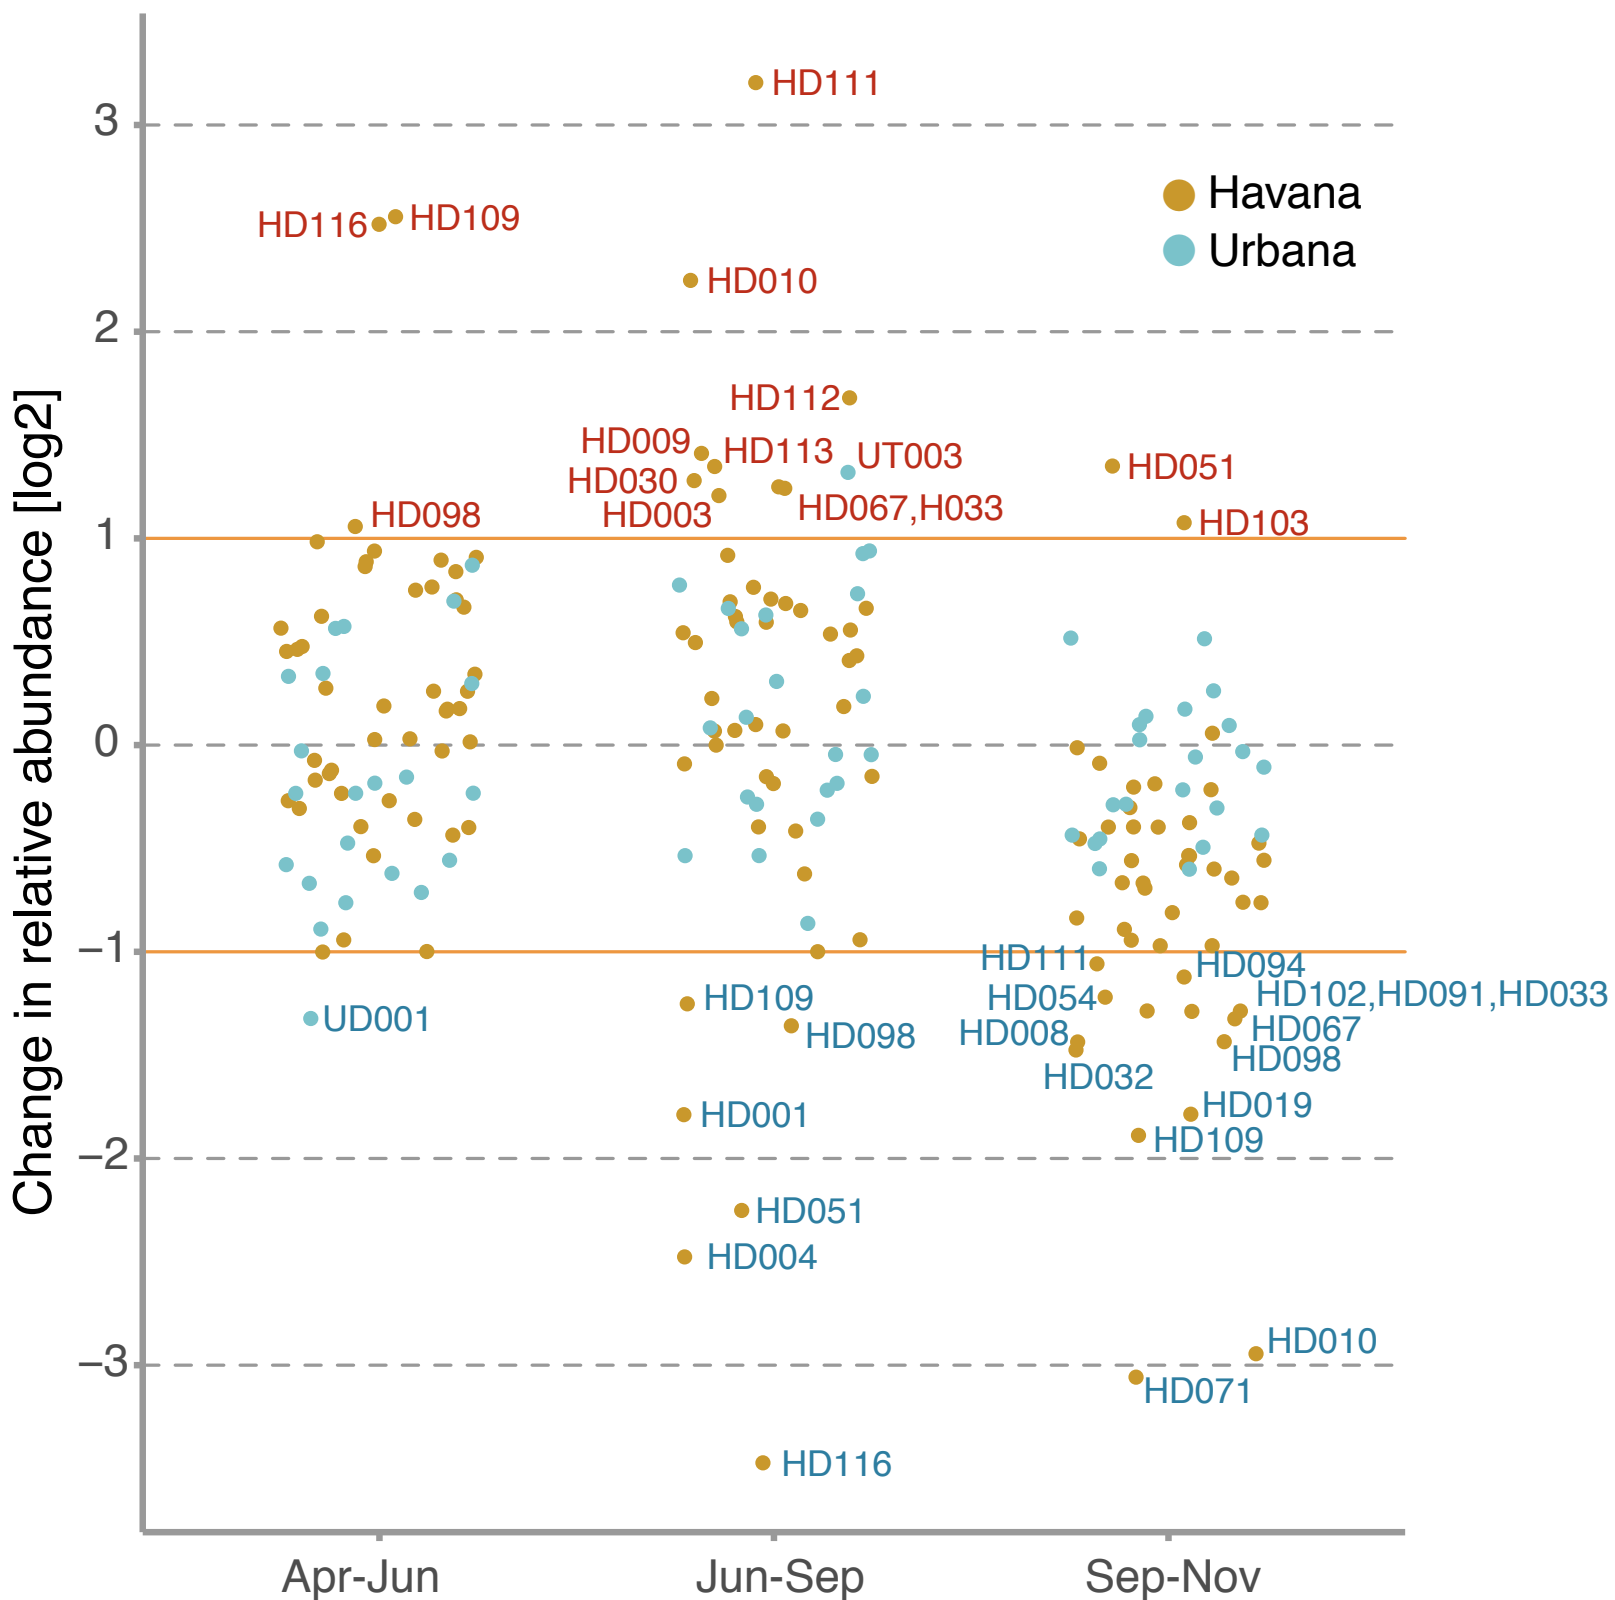



## Supplementary Figure 9

### Havana

### Urbana

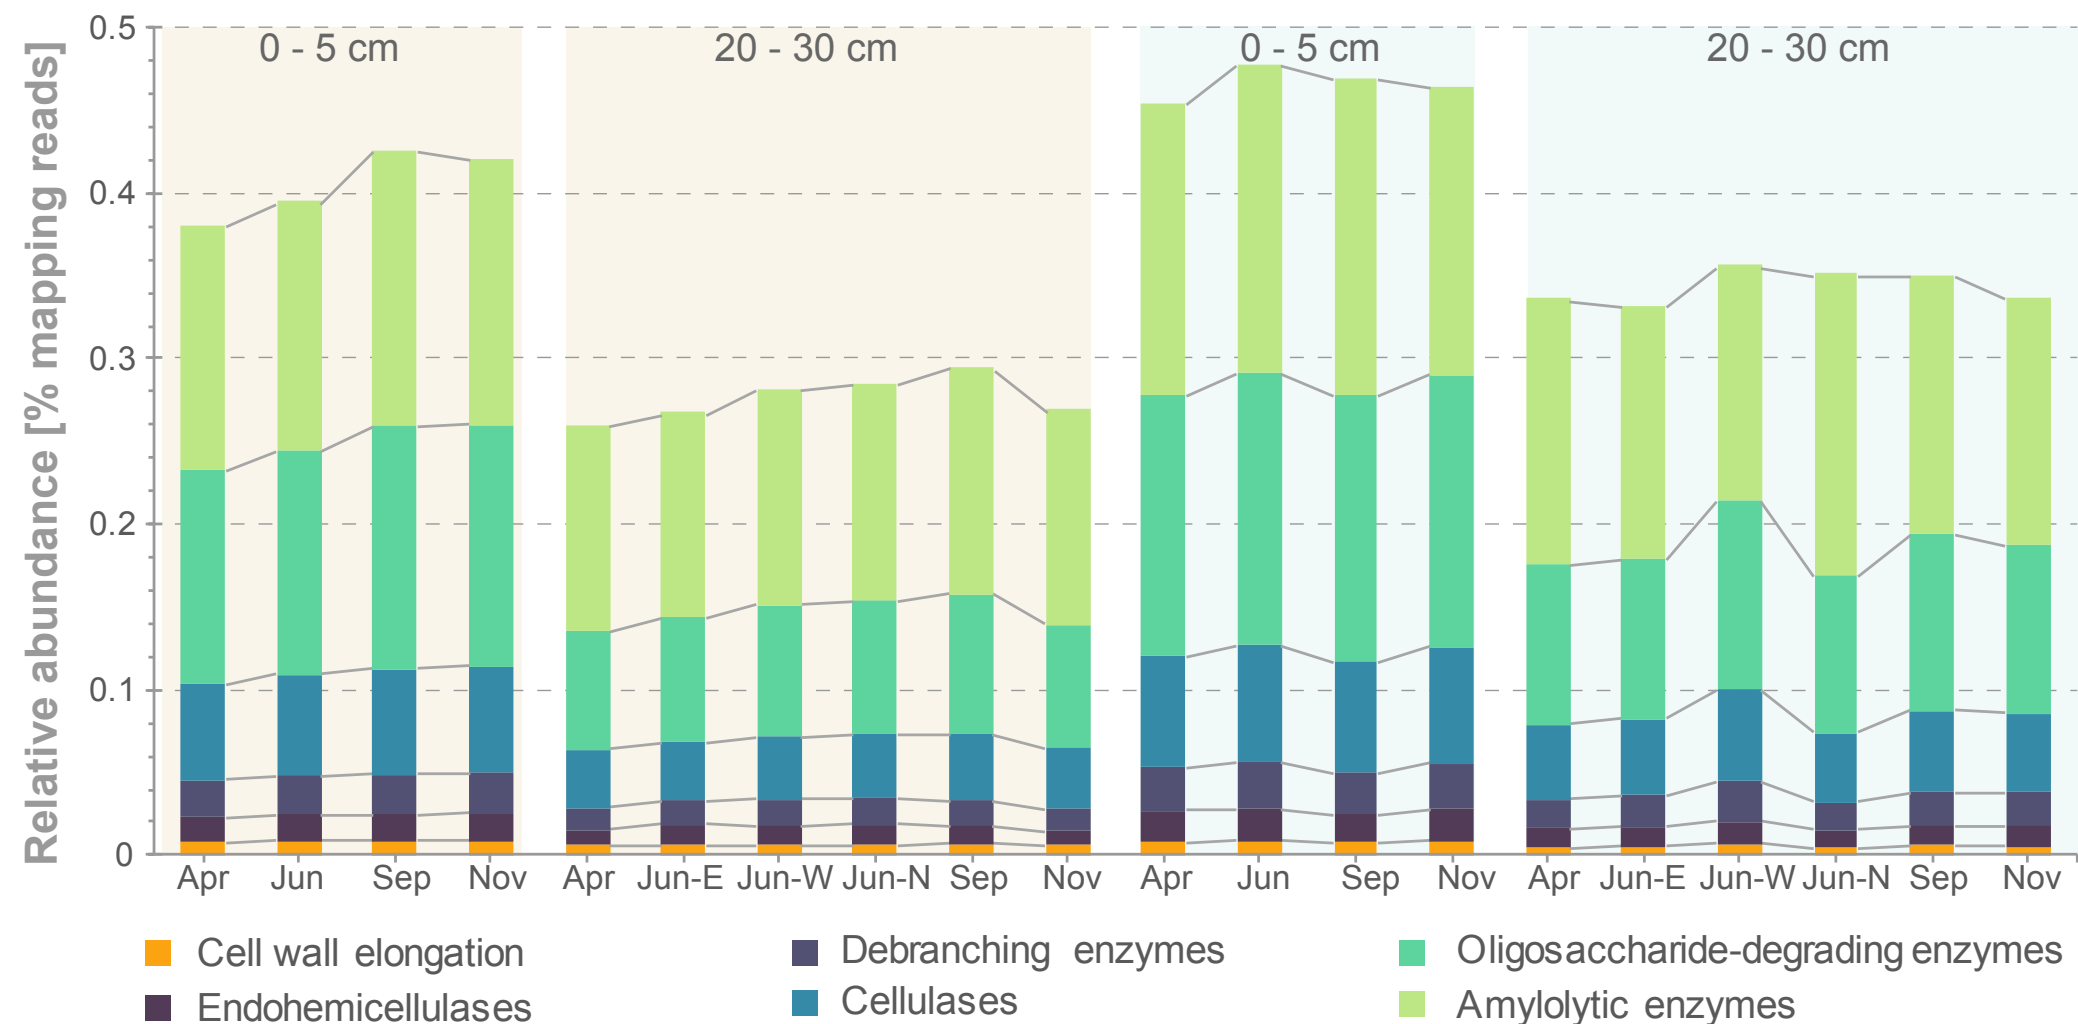

Supplementary Table 1

| Site                       | ID      | Depth<br>[cm] | Sampling date during 2012 | Soil metadata |                      |             |       |       |       |                    |                                 |                  |                |       |            |          |
|----------------------------|---------|---------------|---------------------------|---------------|----------------------|-------------|-------|-------|-------|--------------------|---------------------------------|------------------|----------------|-------|------------|----------|
|                            |         |               |                           | pH            | Total organic matter | Available P | K     | Mg    | Ca    | NO <sub>3</sub> -N | NH <sub>4</sub> <sup>+</sup> -N | Total Kjeldahl N | Extractable Fe | CEC   | Temp       | Moisture |
|                            |         |               |                           |               | [%]                  | [ppm-P]     | [ppm] | [ppm] | [ppm] | [ppm]              | [ppm]                           | [ppm]            | [%]            | [ppm] | [meq/100g] | [°C]     |
| Havana<br>(sandy soil)     | K10     | 0 - 5         | Apr 4                     | 7.7           | 0.7                  | 49          | 59    | 118   | 729   | 4                  | 5                               | 0.039            | 160            | 4.8   | 17.9       | 4.63     |
|                            | K14     |               | Jun 6                     | 7.7           | 1.3                  | 55          | 91    | 126   | 838   | 74                 | 139                             | 0.083            | 138            | 5.5   | 32.6       | 4.99     |
|                            | K6      |               | Sep 5                     | 7.3           | 1.2                  | 53          | 68    | 144   | 851   | 6                  | 2                               | 0.064            | 150            | 5.6   | 23.1       | 6.33     |
|                            | K2      |               | Nov 6                     | 7.6           | 0.9                  | 54          | 78    | 139   | 816   | 8                  | 5                               | 0.048            | 142            | 5.4   | 8.4        | 4.65     |
|                            | K12     | 20 - 30       | Apr 4                     | 7.4           | 0.4                  | 43          | 41    | 60    | 443   | 1                  | 2                               | 0.02             | 132            | 2.8   | 17.4       | 4.93     |
|                            | K18 (E) |               | Jun 6                     | 7.35          | 0.6                  | 50          | 38    | 56    | 572   | 1                  | 4                               | 0.022            | 163            | 3.4   | 22.8       | 6.74     |
|                            | K19 (M) |               | Jun 6                     | 7.3           | 0.6                  | 50          | 38    | 56    | 572   | 1                  | 4                               | 0.022            | 163            | 3.4   | 22.8       | 3.53     |
|                            | K20 (W) |               | Jun 6                     | 7.48          | 0.6                  | 50          | 38    | 56    | 572   | 1                  | 4                               | 0.022            | 163            | 3.4   | 22.8       | 5.49     |
|                            | K8      |               | Sep 5                     | 7             | 0.3                  | 48          | 49    | 70    | 489   | 1                  | 1                               | 0.021            | 160            | 3.2   | 23.6       | 4.85     |
|                            | K4      |               | Nov 6                     | 7.4           | 0.4                  | 58          | 43    | 77    | 471   | 1                  | 3                               | 0.027            | 162            | 3.1   | 10         | 4.55     |
| Urbana<br>(silt-loam soil) | K9      | 0 - 5         | Apr 2                     | 5.9           | 3.7                  | 46          | 179   | 355   | 1,800 | 12                 | 4                               | 0.158            | 172            | 18.6  | 22.7       | 19.31    |
|                            | K13     |               | Jun 4                     | 5.3           | 3.5                  | 45          | 202   | 369   | 1,998 | 26                 | 4                               | 0.16             | 161            | 19.6  | 20.4       | 18.65    |
|                            | K5      |               | Aug 29                    | 5.6           | 4.2                  | 54          | 234   | 425   | 2,412 | 29                 | 3                               | 0.167            | 194            | 21    | 21.3       | 19.33    |
|                            | K1      |               | Nov 8                     | 6             | 3.7                  | 46          | 187   | 373   | 2,051 | 6                  | 4                               | 0.152            | 182            | 17.4  | 9.1        | 21.82    |
|                            | K11     | 20 - 30       | Apr 2                     | 6.2           | 4.1                  | 21          | 122   | 558   | 3,135 | 4                  | 5                               | 0.15             | 138            | 24.2  | 18.2       | 21.6     |
|                            | K15 (M) |               | Jun 4                     | 5.92          | 3.8                  | 18          | 59    | 456   | 2,550 | 7                  | 4                               | 0.14             | 113            | 19.1  | 19.7       | 20.33    |
|                            | K16 (S) |               | Jun 4                     | 6.92          | 3.8                  | 18          | 59    | 456   | 2,550 | 7                  | 4                               | 0.14             | 113            | 19.1  | 19.7       | 19.71    |
|                            | K17 (N) |               | Jun 4                     | 6.2           | 3.8                  | 18          | 59    | 456   | 2,550 | 7                  | 4                               | 0.14             | 113            | 19.1  | 19.7       | 22.69    |
|                            | K7      |               | Aug 29                    | 6.1           | 4.1                  | 25          | 102   | 498   | 2,913 | 4                  | 3                               | 0.155            | 138            | 22.6  | 21.8       | 18.78    |
| K3                         | Nov 8   | 6.2           | 3.7                       | 20            | 79                   | 449         | 2,669 | 7     | 4     | 0.127              | 126                             | 20.9             | 7.8            | 20.93 |            |          |

Supplementary Table 2

| Site   | Sampling date during 2012 | Crop information                                                              | Tillage & N-fertilizer input                             | Notes                                             |
|--------|---------------------------|-------------------------------------------------------------------------------|----------------------------------------------------------|---------------------------------------------------|
| Havana | Apr 4                     | Pre-tillage, pre-fertilizer, pre-planting at time of sampling (winter fallow) | Pre-Tillage, Pre-fertilizer                              |                                                   |
|        | Jun 6                     | Corn planted May 12                                                           | Spring tillage, UAN28 applied late April (180 lb N/acre) | Herbicide applied June 15                         |
|        | Sep 5                     | Full canopy corn; beginning senesce                                           |                                                          |                                                   |
|        | Nov 6                     | Post-soybean harvest by time of sampling; harvested few days prior            |                                                          |                                                   |
| Urbana | Apr 2                     | Pre-planting at time of sampling (winter fallow)                              | Pre-Tillage                                              |                                                   |
|        | Jun 4                     | Pre-planting at time of sampling                                              | Spring tillage<br>No UAN28 application this crop year    | Soybean planted Jun 6, 2012, glyphosate late June |
|        | Aug 29                    | Full canopy soybean                                                           |                                                          | Full growing season rain-fed only                 |
|        | Nov 8                     | Post-harvest; Soybean harvested Nov 1                                         | No Fall tillage yet                                      |                                                   |

Supplementary Table 3

| Site   | ID  | Depth          | Month     | Sequences      |                            | Coverage |
|--------|-----|----------------|-----------|----------------|----------------------------|----------|
|        |     |                |           | Trimmed Reads* | Trimmed reads length (avg) |          |
| Havana | K2  | 0 - 5 cm       | November  | 27,808,182     | 123.8                      | 0.117    |
|        | K4  | 20 - 30 cm     | November  | 24,373,825     | 123.7                      | 0.192    |
|        | K6  | 0 - 5 cm       | September | 32,787,009     | 124.3                      | 0.116    |
|        | K8  | 20 - 30 cm     | September | 33,047,556     | 124.7                      | 0.178    |
|        | K10 | 0 - 5 cm       | April     | 38,337,187     | 124.5                      | 0.105    |
|        | K12 | 20 - 30 cm     | April     | 29,017,415     | 124.5                      | 0.172    |
|        | K14 | 0 - 5 cm       | June      | 53,543,681     | 126.6                      | 0.294    |
|        | K18 | 20 - 30 cm (E) | June      | 30,610,876     | 129.2                      | 0.226    |
|        | K19 | 20 - 30 cm (M) | June      | 31,784,017     | 129.1                      | 0.203    |
|        | K20 | 20 - 30 cm (W) | June      | 49,463,716     | 126.8                      | 0.427    |
| Urbana | K1  | 0 - 5 cm       | November  | 21,681,291     | 124.5                      | 0.101    |
|        | K3  | 20 - 30 cm     | November  | 26,427,577     | 123.9                      | 0.155    |
|        | K5  | 0 - 5 cm       | September | 28,018,675     | 123.7                      | 0.188    |
|        | K7  | 20 - 30 cm     | September | 26,864,164     | 124.3                      | 0.159    |
|        | K9  | 0 - 5 cm       | April     | 32,535,582     | 124.6                      | 0.127    |
|        | K11 | 20 - 30 cm     | April     | 30,652,664     | 124.3                      | 0.215    |
|        | K13 | 0 - 5 cm       | June      | 34,023,870     | 124.4                      | 0.162    |
|        | K15 | 20 - 30 cm (M) | June      | 29,187,308     | 127.0                      | 0.237    |
|        | K16 | 20 - 30 cm (S) | June      | 72,914,672     | 126.9                      | 0.492    |
|        | K17 | 20 - 30 cm (N) | June      | 32,057,255     | 126.0                      | 0.466    |

Supplementary Table 4

| Samples     | Depth    | Million reads | IDBA co-assembly |       |             |                | Gene Prediction |         |
|-------------|----------|---------------|------------------|-------|-------------|----------------|-----------------|---------|
|             |          |               | Contigs          | N50   | Avg. length | Longest contig | Total bp        | Genes   |
| Havana top  | 0-5 cm   | 136,453,108   | 118,687          | 1,130 | 1,160.5     | 46,851         | 137,742,067     | 220,365 |
| Havana deep | 20-30 cm | 179,133,698   | 419,023          | 1,779 | 1,568.9     | 388,680        | 657,447,015     | 938,759 |
| Urbana top  | 0-5 cm   | 104,056,954   | 147,610          | 1,349 | 1,308.9     | 60,203         | 193,216,907     | 301,988 |
| Urbana deep | 20-30 cm | 195,425,606   | 430,724          | 1,524 | 1,409.7     | 78,105         | 607,223,845     | 883,376 |

Supplementary Table 5

| Target Protein               | ROCKER build (125 bp read length) |                     |             |             |          |
|------------------------------|-----------------------------------|---------------------|-------------|-------------|----------|
|                              | Positive references               | Negative references | Sensitivity | Specificity | Accuracy |
| <b>AmoA bacteria</b>         | 7                                 | 14                  | 92.60%      | 99.64%      | 98.10%   |
| <b>AmoA archaea</b>          | 5                                 | 16                  | 100%        | 100%        | 100%     |
| <b>Hao</b>                   | 22                                | 9                   | 98.72%      | 99.89%      | 99.14%   |
| <b>NarG/NxrA</b>             | 311                               | 0                   | 99.68%      | 99.98%      | 99.96%   |
| <b>NirK (Clade I and II)</b> | 140                               | 8                   | 96.79%      | 99.99%      | 99.95%   |
| <b>NirK (Thaumarchaeota)</b> | 18                                | 0                   | 98.15%      | 100%        | 100.00%  |
| <b>NirK (Clade III)</b>      | 10                                | 0                   | 96.38%      | 100%        | 100.00%  |
| <b>NirS</b>                  | 74                                | 33                  | 97.83%      | 100.00%     | 99.97%   |
| <b>NorB</b>                  | 309                               | 0                   | 98.99%      | 99.97%      | 99.94%   |
| <b>NosZ</b>                  | 166                               | 0                   | 98.55%      | 99.99%      | 99.96%   |
| <b>UreC</b>                  | 103                               | 0                   | 99.42%      | 99.99%      | 99.98%   |
| <b>NrfA</b>                  | 260                               | 8                   | 98.11%      | 99.97%      | 99.94%   |
| <b>RpoB</b>                  | 756                               | 0                   | 99.71%      | 99.34%      | 99.62%   |
